# Supplementary material
Source: PubMed Central journal article supplement (PMC6777806)
Supplement: jciinsight-4-129954-s055.pdf [file jciinsight-4-129954-s055.pdf]

# Supplementary Figure 1

A

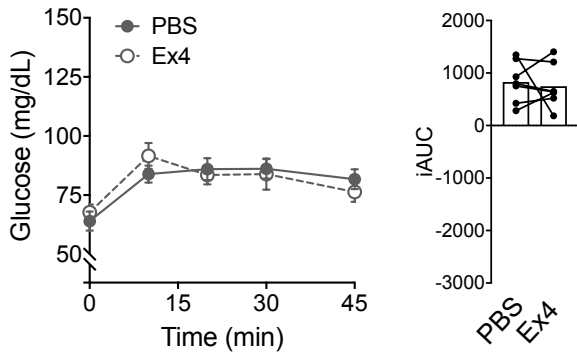

B

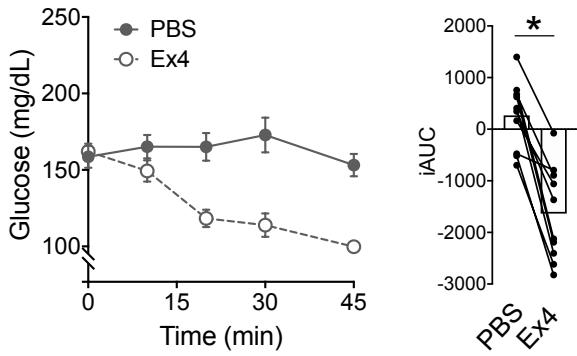

**The effects of Ex4 depend on the starting glycemic level.** A) WT mice fasted overnight did not have a glycemic response to Ex4 (0.3 nmol/kg). B) Fed WT mice given Ex4 responded with a decline in glycemia. \* -  $p < 0.05$  vs PBS control, values are mean  $\pm$  SEM.

## Supplementary Figure 2

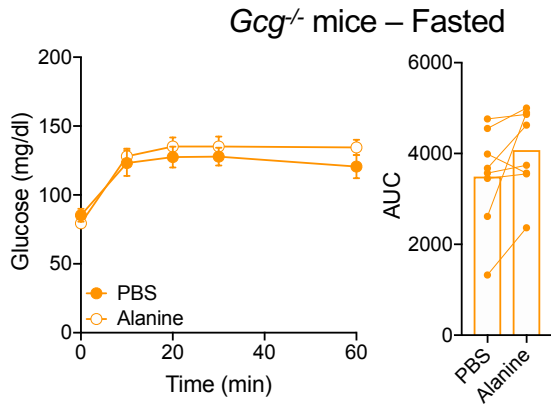

**The glycemic effects of exogenous alanine in *Gcg*<sup>-/-</sup> mice.** Alanine given intraperitoneally to fasted *Gcg*<sup>-/-</sup> mice did not alter glycemia compared to PBS control. Values are mean  $\pm$  SEM.

## Supplementary Figure 3

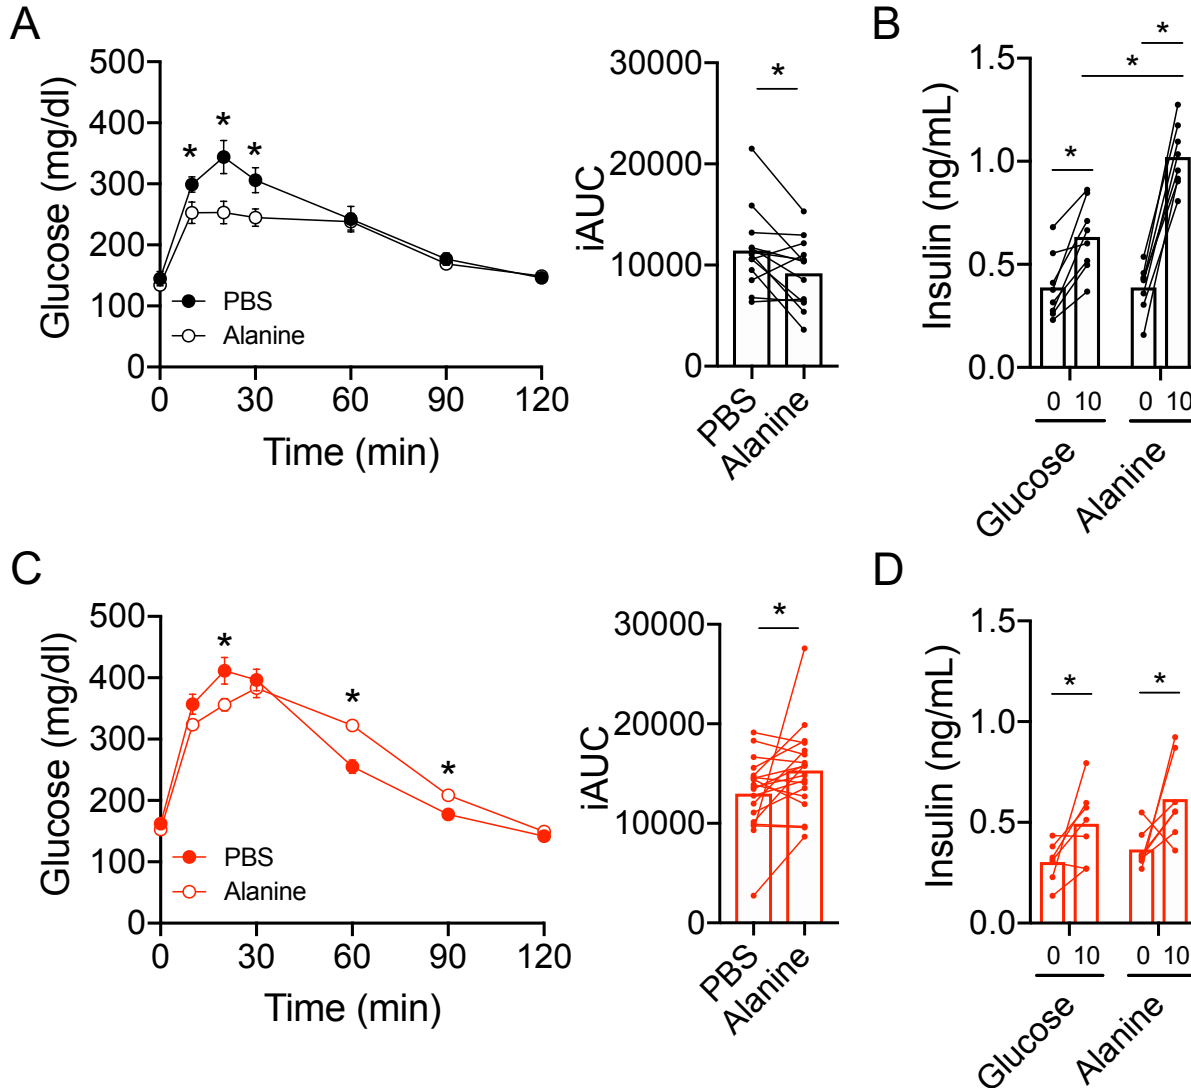

**Exogenous alanine stimulates insulin secretion in WT mice.** A) WT mice given alanine along with glucose (1.5 g/kg) intraperitoneally reduces glycemia and B) stimulates insulin secretion more than glucose alone. C) Alanine + glucose in *Gcgr:Glp1 $\beta$ cell<sup>-/-</sup>* mice leads to a higher glucose AUC and D) fails to stimulate insulin secretion beyond glucose alone. \* -  $p < 0.05$  vs PBS control, values are mean  $\pm$  SEM.
